# Supplementary material
Source: Elsevier journal article supplement (https://www.sciencedirect.com/science/article/pii/S2530064418301718)
Supplement: mmc2 [file S2530064418301718:mmc2.docx]

Table S1 – Results of analyses of variance examining the effect of soil type on the mean value of the vegetation indices NDVI and EVI and their coefficient of variation during the rainy season of 2011-2016.

| **Response variable** | **Rainy season** | |
| --- | --- | --- |
| **F** | ***p*** |
| Landscape NDVI | 0.78 | 0.37 |
| Landscape EVI | 0.39 | 0.53 |
| Forest NDVI | 0.00 | 0.97 |
| Forest EVI | 0.86 | 0.35 |
| Cropland NDVI | 0.53 | 0.58 |
| Cropland EVI | 0.18 | 0.83 |
| Forest CV NDVI | 1.02 | 0.37 |
| Forest CV EVI | 1.68 | 0.21 |
| Cropland CV NDVI | 4.29 | 0.25 |
| Cropland CV EVI | 2.17 | 0.13 |
